# Supplementary material for: Dual bilinear rotations
Source: Copernicus journal article supplement (doi:10.5194/mr-7-89-2026), 2026-06-24
Supplement: Supplementary file [file mr-7-89-2026-supplement.pdf]

Supplement of Magn. Reson., 7, 89–98, 2026  
<https://doi.org/10.5194/mr-7-89-2026-supplement>  
© Author(s) 2026. CC BY 4.0 License.

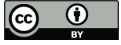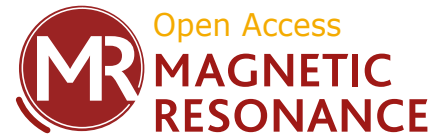

*Supplement of*

## **Dual bilinear rotations**

**Yannik T. Woordes and Burkhard Luy**

*Correspondence to:* Burkhard Luy (burkhard.luy@kit.edu)

The copyright of individual parts of the supplement might differ from the article licence.

## Contents

|                                                                                                      |           |
|------------------------------------------------------------------------------------------------------|-----------|
| <b>S1 The COB-variant of the quadruple <math>J</math>-resolved pulse sequence</b>                    | <b>2</b>  |
| <b>S2 Spectra of the COB-variant of the quadruple <math>J</math>-resolved experiment for glucose</b> | <b>3</b>  |
| <b>S3 2D <math>J</math>-resolved subspectra for glucose</b>                                          | <b>4</b>  |
| <b>S4 Proton subspectra of the quadruple <math>J</math>-resolved experiment for mixture</b>          | <b>6</b>  |
| <b>S5 2D <math>J</math>-resolved subspectra for mixture</b>                                          | <b>7</b>  |
| <b>S6 Broadband refocusing pulse shape used (<math>^{13}\text{C}</math>)</b>                         | <b>9</b>  |
| <b>S7 Broadband refocusing pulse shape used (<math>^1\text{H}</math>)</b>                            | <b>13</b> |

## S1 The COB-variant of the quadruple $J$ -resolved pulse sequence

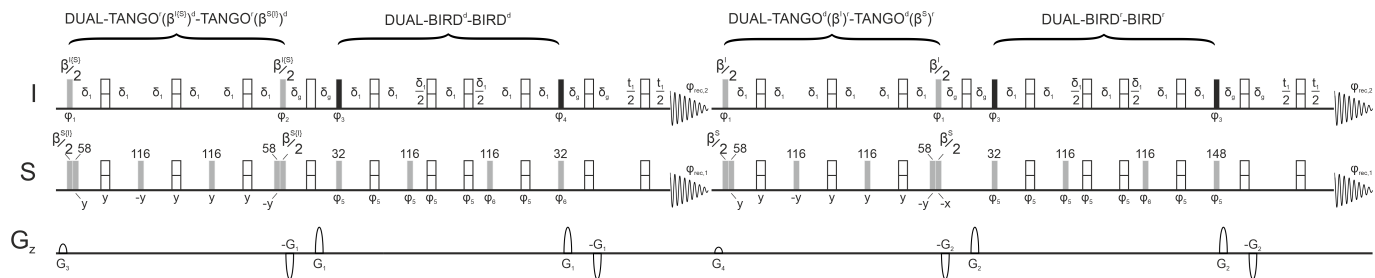

**Figure S1.** Quadruple  $J$ -resolved experiment designed to rapidly acquire four hetero- and homonuclear decoupled spectra for differentiating  $I\{S_{2n}\}$ ,  $I\{S_{2n+1}\}$ ,  $S\{I_{2n}\}$ , and  $S\{I_{2n+1}\}$  employing the coupling compensated bilinear rotations as described in (Woordes et al., 2025) with typically  $I = {}^1\text{H}$  and  $S = {}^{13}\text{C}$ . Black, solid bars describe hard  $90^\circ$  pulses, while gray solid bars stand for hard pulses with flip angles as annotated. Open bars with a dividing central line describe universal rotation  $180^\circ$  pulses. Delays  $\delta_1$  correspond to 2.583 ms. The delays with duration  $\delta_g$  are determined by corresponding gradient durations and necessary gradient recovery delays. Gradients of  $250 \mu\text{s}$  duration and a recovery delay of  $50 \mu\text{s}$  have been used on our spectrometer with typical strengths of  $G_1 = 81\%$ ,  $G_2 = 79\%$ ,  $G_3 = 29\%$ , and  $G_4 = 19\%$  of the maximum gradient strength of the probehead ( $\approx 50 \text{ G/cm}$ ). Phases of the pulses are all  $x$  unless indicated otherwise. A basic phase cycle has been applied with  $\varphi_1 = x, -x$ ,  $\varphi_2 = -x, x$ ,  $\varphi_3 = x, -x$ ,  $y, -y$ ,  $\varphi_4 = -x, x, -y, y$ ,  $\varphi_5 = x, y, -x, -y$ ,  $\varphi_6 = -x, -y, x, y$ ,  $\varphi_{rec,1} = x, -x, -x, x$ , and  $\varphi_{rec,2} = x, -x$ . Please note that the sequence requires dual receive capabilities.

## S2 Spectra of the COB-variant of the quadrupole $J$ -resolved experiment for glucose

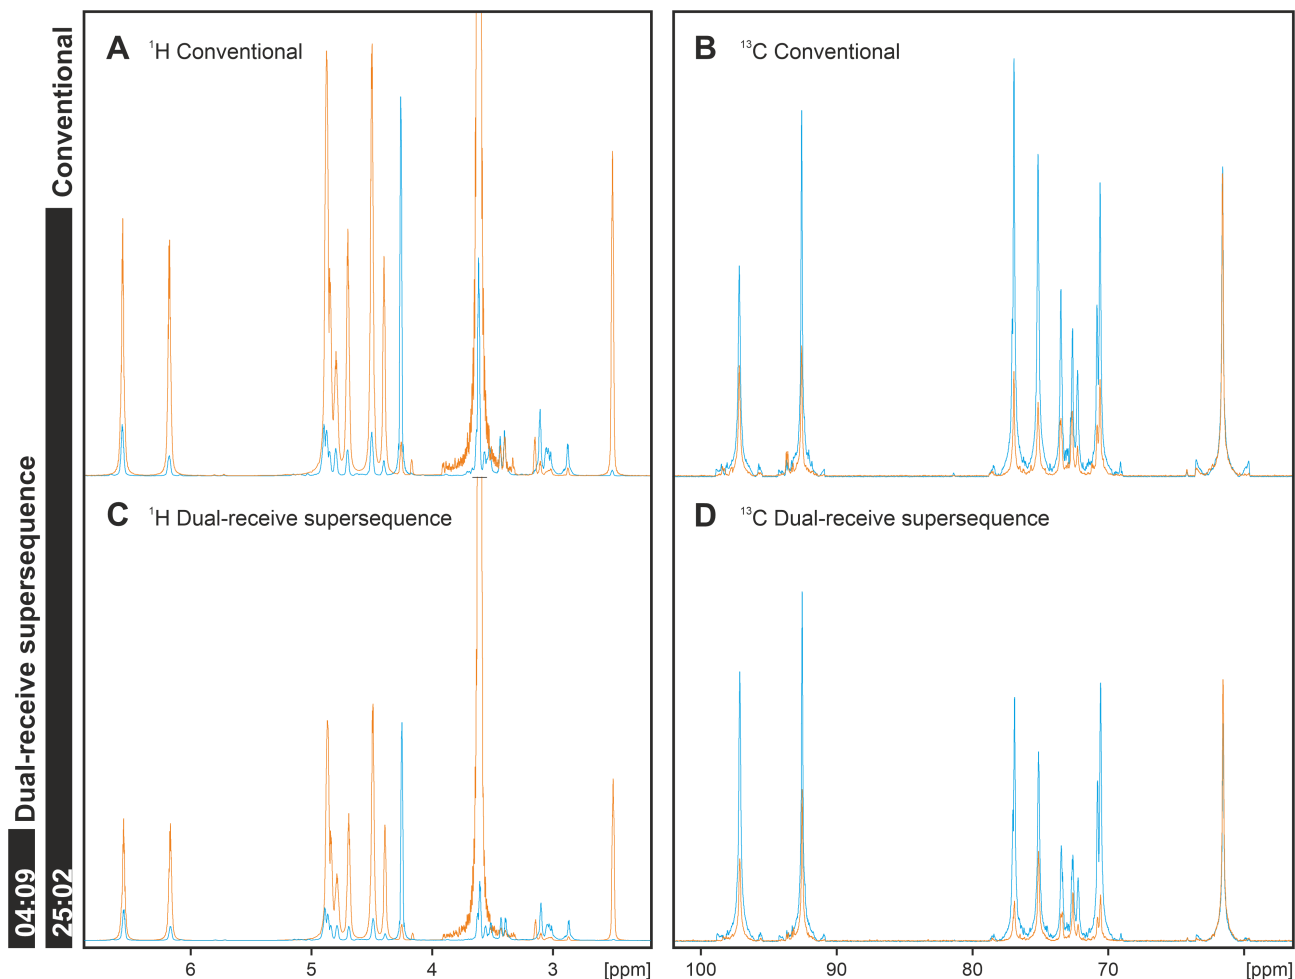

**Figure S2.** Various fully heteronuclear and homonuclear decoupled  $^1\text{H}$  (A, C) and  $^{13}\text{C}$  (B, D) 1D spectra on uniformly  $^{13}\text{C}$  labeled glucose dissolved in  $\text{DMSO-}d_6$ . All spectra are obtained via 2D  $J$ -resolved experiments either in the conventional matter where all four need to be measured separately (A, B), or in a quadrupole  $J$ -resolved experiment as described in Fig. S1. In the conventional case the total experiment time amounts to 25 minutes and 2 seconds, whereas the implementation of dual-receiver with NORD type interleaving reduces the time to just 4 minutes and 9 seconds, as highlighted in the bars on left of the figure. The orange and blue color indicate  $I\{S_{2n}\} / S\{I_{2n}\}$ , and  $I\{S_{2n+1}\} / S\{I_{2n+1}\}$  selection. Assignment can be found in the main text figures 4 and 5.  $\beta^I = \beta^{I\{S\}} = \beta^{S\{I\}} = \beta^S = 90^\circ$ ;  $^1\text{H}$  pulses with  $90^\circ$  duration of  $9.7 \mu\text{s}$  were irradiated at 4.48 ppm,  $^{13}\text{C}$  pulses with  $90^\circ$  duration of  $12.0 \mu\text{s}$  at 80.0 ppm; acquisition times were 250 ms in the indirect  $t_1$  dimensions using 64 increments each; direct acquisition times with 4k complex data points were 350 ms for  $^1\text{H}$  and 160 ms for  $^{13}\text{C}$ . Spectra were zero-filled to  $128 \times 8\text{k}$  points. 2D  $J$ -resolved type spectra were processed using sine-apodization in the direct dimension and either sine- or exponential-apodization in the indirect dimension for the  $^1\text{H}$  and  $^{13}\text{C}$  spectra, respectively. Subsequently, the 2D spectra were tilted and the projection along the direct dimension is shown.

### S3 2D $J$ -resolved subspectra for glucose

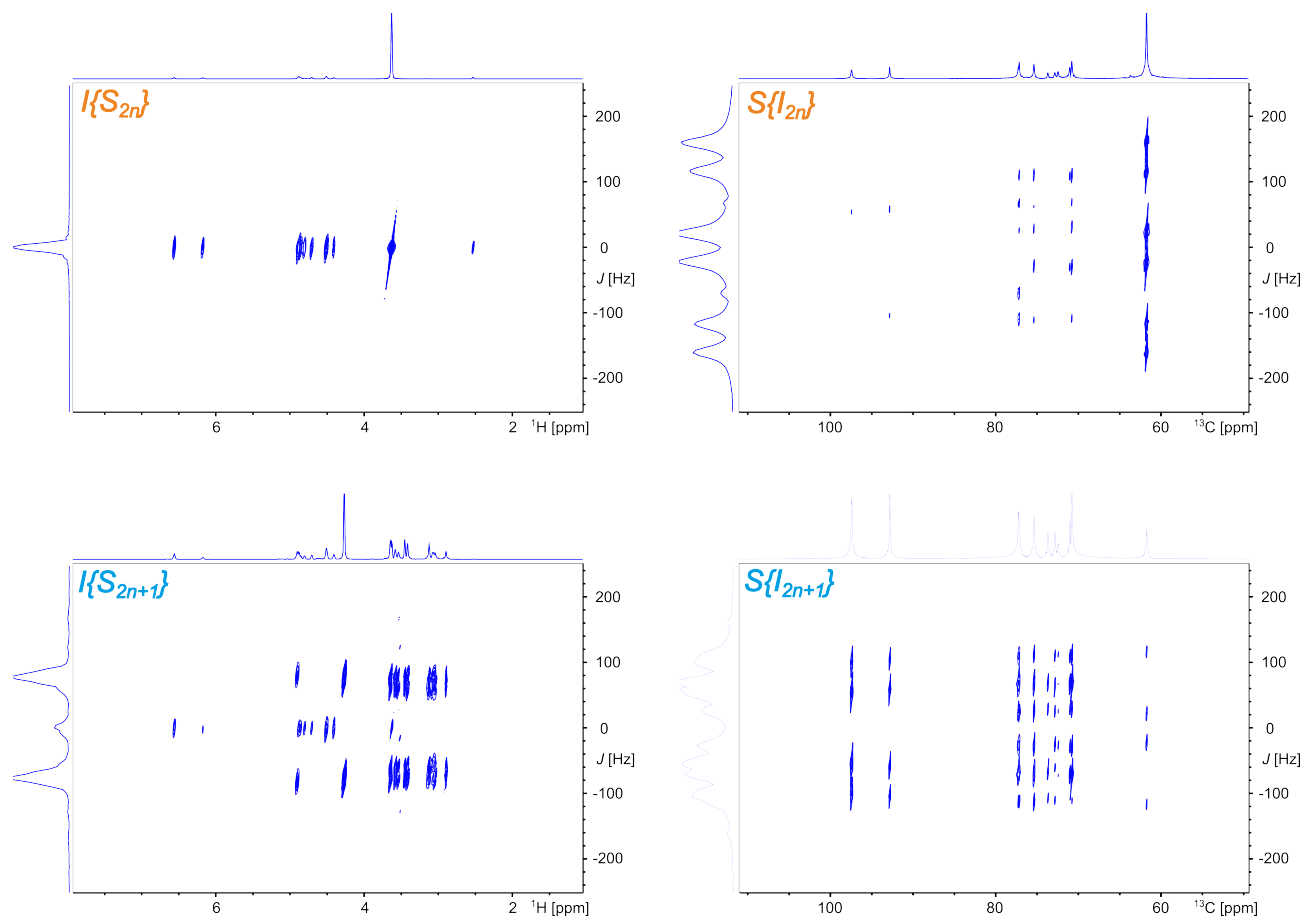

**Figure S3.** 2D  $J$ -subspectra for the projections shown in Figs. 4 and 5 in the main text. top left) non- $^{13}\text{C}$ -bound protons; bottom left)  $^{13}\text{C}$ -bound protons; top right)  $^{13}\text{C}$  spectrum of carbons with an even number of attached protons; bottom right)  $^{13}\text{C}$  spectrum of carbons with an odd number of attached protons.

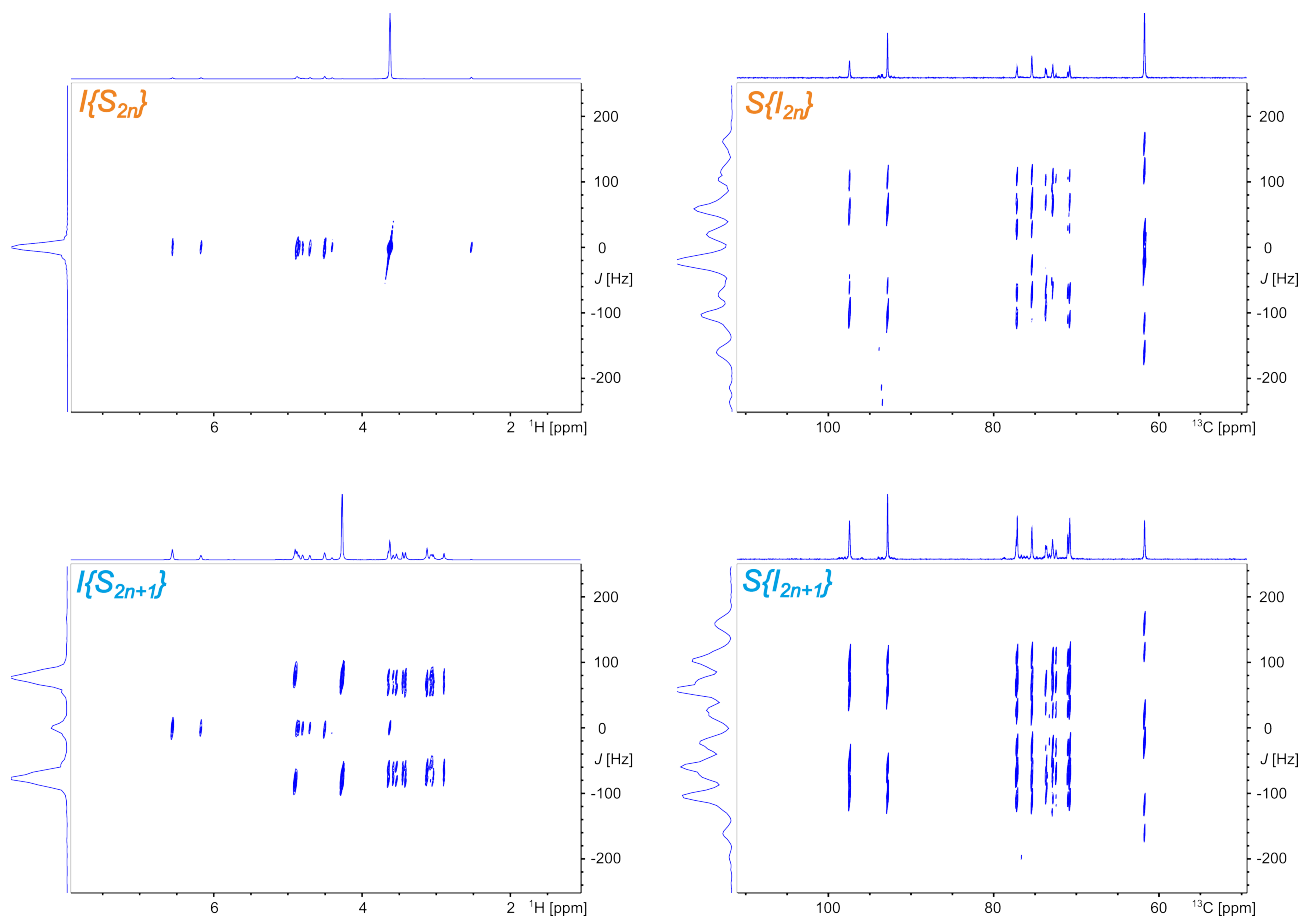

**Figure S4.** 2D  $J$ -subspectra for the COB-enhanced version of D-glucose. top left) non- $^{13}\text{C}$ -bound protons; bottom left)  $^{13}\text{C}$ -bound protons; top right)  $^{13}\text{C}$  spectrum of carbons with an even number of attached protons; bottom right)  $^{13}\text{C}$  spectrum of carbons with an odd number of attached protons.

#### S4 Proton subspectra of the quadruple $J$ -resolved experiment for mixture

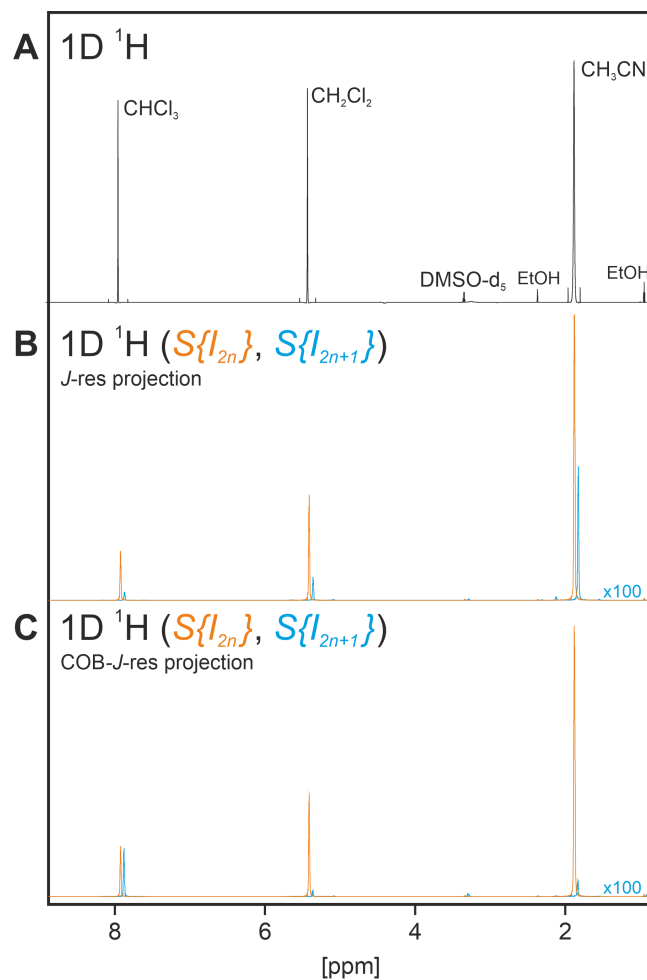

**Figure S5.** In Fig. 6 of the main text,  $^{13}\text{C}$  subspectra of the quadruple  $J$ -resolved experiment are shown for a mixture of four small molecule compounds dissolved in DMSO- $d_6$ . The proton counterparts are summarized here. Please be aware that non- $^{13}\text{C}$ -bound protons form the majority for the natural abundance sample. The opposite experiment leads to a very weak spectrum of natural abundance  $^{13}\text{C}$ -bound protons. No additional information is gained, as, of course, all molecules have  $^{12}\text{C}$  and  $^{13}\text{C}$  bound protons. Signal intensities of the blue spectra may also be compromised by residual  $^{12}\text{C}$  bound proton artefacts.

## S5 2D $J$ -resolved subspectra for mixture

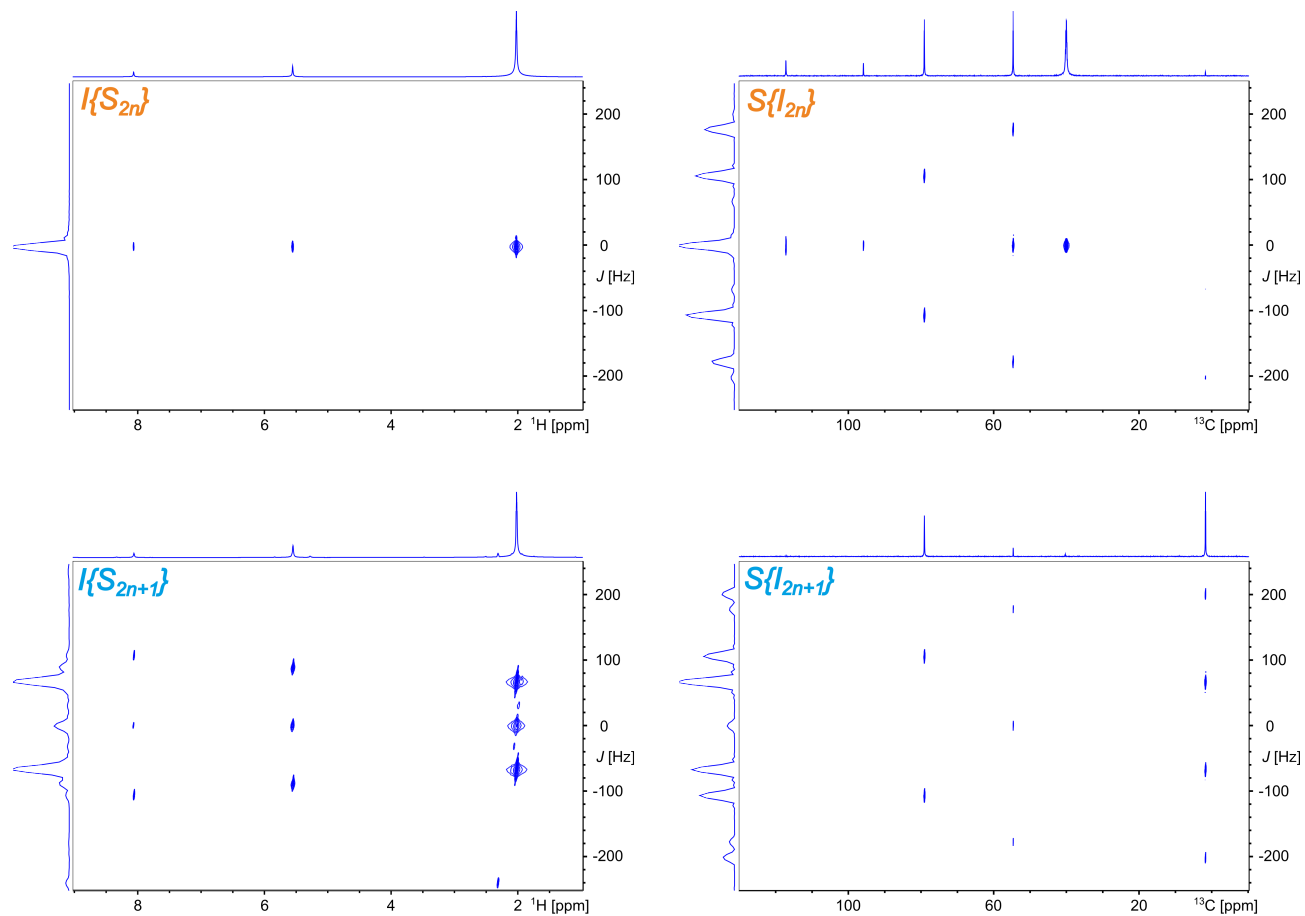

**Figure S6.** 2D  $J$ -subspectra for the projections shown in Fig. 6 and S5. top left) non- $^{13}\text{C}$ -bound protons; bottom left)  $^{13}\text{C}$ -bound protons; top right)  $^{13}\text{C}$  spectrum of carbons with an even number of attached protons; bottom right)  $^{13}\text{C}$  spectrum of carbons with an odd number of attached protons.

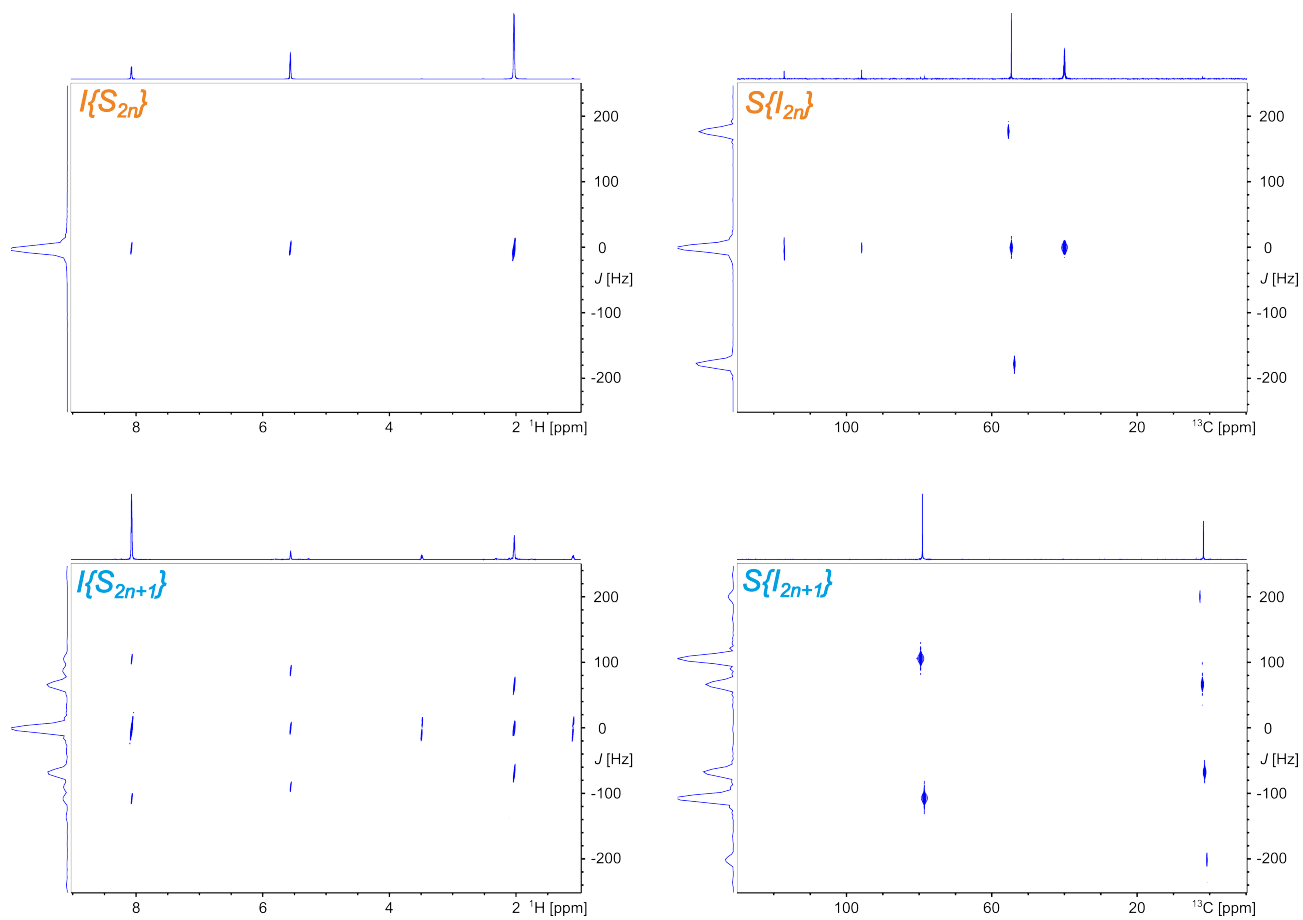

**Figure S7.** 2D  $J$ -subspectra for the COB-enhanced version of the mixture described in the main text. top left) non- $^{13}\text{C}$ -bound protons; bottom left)  $^{13}\text{C}$ -bound protons; top right)  $^{13}\text{C}$  spectrum of carbons with an even number of attached protons; bottom right)  $^{13}\text{C}$  spectrum of carbons with an odd number of attached protons.

## S6 Broadband refocusing pulse shape used ( $^{13}\text{C}$ )

Broadband universal rotation  $180^\circ$  pulse shape (BURBOP-180) for a bandwidth of 10 kHz, an rf-amplitude  $\nu_{\text{rf}} = 15$  kHz,  $B_1$ -field compensation of  $\pm 10\%$ , and a pulse length  $t_p$  of  $300 \mu\text{s}$  in Bruker Topspin shape format (amplitude, phase). Quality factor of the pulse shape was  $>0.99999$ . Please note that it is *not*  $J$ -compensated like the BUBI (Ehni and Luy, 2013) or BUBU (Ehni et al., 2022) pulse sandwiches. The pulses, however, are very short and unwanted effects within the bilinear rotations will be small. To save space, we present it in two-column format.

```
##TITLE= BURBOP180x_300us_BW10k_RF15k_pm10_99999.brk      100.0, -127.094862
##JCAMP-DX=                                                100.0, -123.935523
##DATA TYPE= Shape Data                                    100.0, -120.488712
##OWNER= yannik t. woordes and burkhard luy                100.0, -116.754105
##DATE= 2025-10-14                                         100.0, -112.663912
##Max_Amplitude= 15000.0                                   100.0, -108.390408
##PULSE_LENGTH= 300.0 us                                  100.0, -103.92156
##NPOINTS= 300                                             100.0, -99.247897
##XYPOINTS= (XY..XY)                                       100.0, -94.474258
100.0, -2.905323\ \                                         100.0, -89.671134
100.0, -8.488571                                           100.0, -84.924104
100.0, -13.146732                                          100.0, -80.308338
100.0, -17.22671                                           99.999999, -75.878584
100.0, -20.93722                                           100.0, -71.679499
100.0, -24.457521                                          100.0, -67.753688
100.0, -27.933281                                          100.0, -64.136673
100.0, -31.482645                                          100.0, -60.808247
100.0, -35.219082                                          100.0, -57.727612
100.0, -39.30336                                           100.0, -54.838422
100.0, -44.091457                                          99.999783, -52.28304
99.999998, -49.906011                                       100.0, -49.909129
99.995691, -57.517012                                       100.0, -47.81563
100.0, -68.040283                                          100.0, -46.013065
100.0, -81.747596                                          100.0, -44.459949
99.997975, -98.738144                                       100.0, -43.102426
99.998345, -115.912561                                       100.0, -41.91737
100.0, -127.961477                                         100.0, -40.908751
99.999999, -135.060486                                       99.999588, -40.051258
100.0, -139.051867                                         99.999508, -39.346599
100.0, -141.232797                                         100.0, -38.846369
100.0, -142.28636                                           99.999858, -38.515727
100.0, -142.828631                                         100.0, -38.235632
100.0, -142.610378                                         100.0, -37.988543
100.0, -141.989762                                         100.0, -37.886419
100.0, -141.28608                                          100.0, -37.801069
100.0, -139.91142                                          100.0, -37.721987
100.0, -138.514457                                         100.0, -37.525726
100.0, -136.783526                                         100.0, -36.898883
100.0, -134.751205                                         100.0, -35.260675
100.0, -132.487755                                         99.999996, -31.430261
100.0, -129.944092                                         99.999989, -19.122712
```

|                       |                      |
|-----------------------|----------------------|
| 100.0, 22.482606      | 99.998572, 33.298452 |
| 100.0, 94.844759      | 100.0, 33.236265     |
| 100.0, 122.58744      | 100.0, 32.211772     |
| 99.99861, 132.733023  | 100.0, 30.286376     |
| 100.0, 137.196231     | 100.0, 27.605847     |
| 100.0, 138.977787     | 100.0, 24.3672       |
| 100.0, 139.664033     | 100.0, 20.763412     |
| 100.0, 139.656609     | 100.0, 16.943085     |
| 100.0, 139.183065     | 100.0, 13.042265     |
| 100.0, 138.442526     | 100.0, 9.199686      |
| 100.0, 137.547037     | 100.0, 5.461704      |
| 100.0, 136.576546     | 100.0, 1.836556      |
| 100.0, 135.601861     | 100.0, -1.631536     |
| 100.0, 134.675285     | 100.0, -4.898273     |
| 100.0, 133.821087     | 100.0, -7.946003     |
| 100.0, 133.03676      | 100.0, -10.781691    |
| 100.0, 132.345587     | 100.0, -13.372326    |
| 100.0, 131.780468     | 100.0, -15.739596    |
| 100.0, 131.351374     | 100.0, -17.834294    |
| 100.0, 131.126904     | 100.0, -19.670562    |
| 100.0, 131.059006     | 100.0, -21.21365     |
| 100.0, 131.159273     | 100.0, -22.464726    |
| 100.0, 131.418924     | 100.0, -23.412506    |
| 100.0, 131.874192     | 100.0, -24.038631    |
| 100.0, 132.500909     | 100.0, -24.351516    |
| 100.0, 133.294617     | 100.0, -24.362389    |
| 100.0, 134.292734     | 100.0, -24.026437    |
| 100.0, 135.530145     | 100.0, -23.40038     |
| 100.0, 137.085136     | 100.0, -22.422741    |
| 100.0, 139.023087     | 100.0, -21.376863    |
| 100.0, 141.00146      | 100.0, -19.604398    |
| 100.0, 143.76174      | 100.0, -17.857746    |
| 100.0, 147.479645     | 100.0, -15.800266    |
| 100.0, 156.373339     | 100.0, -13.479015    |
| 100.0, 0.747722       | 100.0, -10.93416     |
| 99.999994, -18.207262 | 100.0, -8.146087     |
| 99.998102, -15.600305 | 100.0, -5.135199     |
| 100.0, -11.396097     | 100.0, -1.912926     |
| 100.0, -7.855169      | 100.0, 1.459882      |
| 100.0, -4.971063      | 100.0, 5.027403      |
| 99.999914, -1.848728  | 100.0, 8.848628      |
| 100.0, 1.459119       | 100.0, 12.608085     |
| 100.0, 4.851378       | 100.0, 16.549325     |
| 100.0, 8.308167       | 100.0, 20.374289     |
| 100.0, 11.818941      | 100.0, 24.035229     |
| 100.0, 15.356981      | 100.0, 27.334894     |
| 100.0, 18.871567      | 100.0, 30.095657     |
| 100.0, 22.285835      | 100.0, 32.114776     |
| 99.998935, 25.494582  | 100.0, 33.239747     |
| 100.0, 28.362688      | 100.0, 33.388489     |
| 100.0, 30.730168      | 100.0, 32.571326     |
| 100.0, 32.426405      | 100.0, 30.887045     |

100.0, 28.493556  
100.0, 25.570257  
100.0, 22.288403  
100.0, 18.7933  
100.0, 15.199895  
99.998499, 11.595966  
100.0, 8.036855  
100.0, 4.558568  
100.0, 1.165512  
100.0, -2.098353  
100.0, -5.162875  
100.0, -7.762385  
100.0, -10.477116  
100.0, -12.34739  
100.0, -11.999236  
100.0, -24.000964  
100.0, 147.386534  
100.0, 145.772137  
100.0, 142.149185  
100.0, 139.811918  
100.0, 137.966932  
100.0, 136.393744  
100.0, 135.005046  
100.0, 133.826762  
99.999978, 132.852886  
100.0, 132.068574  
100.0, 131.46774  
100.0, 131.047594  
100.0, 130.797125  
100.0, 130.726124  
100.0, 130.822171  
100.0, 131.08098  
100.0, 131.494334  
100.0, 132.051595  
100.0, 132.740851  
100.0, 133.546452  
100.0, 134.449311  
100.0, 135.42028  
100.0, 136.423467  
100.0, 137.416124  
100.0, 138.341979  
100.0, 139.123516  
100.0, 139.632332  
100.0, 139.731568  
100.0, 139.101088  
100.0, 137.207045  
100.0, 133.038373  
100.0, 124.404035  
99.999935, 97.31823  
100.0, 25.462193  
100.0, -17.677175  
100.0, -31.105177

100.0, -35.425975  
100.0, -37.349333  
100.0, -37.979728  
100.0, -38.14695  
100.0, -38.19794  
100.0, -38.323272  
100.0, -38.424866  
100.0, -38.579552  
100.0, -38.82613  
100.0, -39.20667  
100.0, -39.761182  
100.0, -40.488457  
100.0, -41.385008  
100.0, -42.451676  
100.0, -43.687782  
99.999257, -45.116379  
100.0, -46.738595  
99.99929, -48.576541  
99.999281, -50.646275  
100.0, -52.964023  
99.999276, -55.535225  
99.999259, -58.378066  
99.999268, -61.459862  
99.999211, -64.864552  
99.999175, -68.537498  
99.999197, -72.452697  
99.999345, -76.631801  
99.9996, -81.061523  
99.999816, -85.645598  
99.999928, -90.345082  
99.999974, -95.123353  
99.999991, -99.857798  
99.999997, -104.502544  
99.999999, -109.008811  
100.0, -113.324921  
100.0, -117.345214  
100.0, -121.12764  
100.0, -124.597781  
100.0, -127.812958  
100.0, -130.720953  
100.0, -133.314139  
100.0, -135.672896  
100.0, -137.731815  
100.0, -139.506318  
100.0, -141.000265  
100.0, -142.1897  
100.0, -143.084349  
100.0, -143.629246  
100.0, -143.80431  
100.0, -143.460755  
100.0, -142.235327  
100.0, -139.792134

100.0, -135.50352  
100.0, -128.273712  
100.0, -116.480944  
100.0, -100.188597  
100.0, -83.3766  
100.0, -69.540656  
100.0, -59.255389  
100.0, -51.627231  
100.0, -45.673366  
100.0, -40.721137

99.999999, -36.503258  
99.999997, -32.556429  
99.999979, -28.958853  
99.999845, -25.446275  
99.999096, -21.757008  
99.99868, -18.071416  
99.999505, -13.956322  
100.0, -9.294006  
100.0, -3.697378  
##END=

## S7 Broadband refocusing pulse shape used ( $^1\text{H}$ )

Broadband universal rotation  $180^\circ$  pulse shape (BURBOP-180) for a bandwidth of 5 kHz, an rf-amplitude  $\nu_{\text{rf}} = 20$  kHz,  $B_1$ -field compensation of  $\pm 30\%$ , and a pulse length  $t_p$  of  $300 \mu\text{s}$  in Bruker Topspin shape format (amplitude, phase). Quality factor of the pulse shape was  $>0.99999$ . Please note that it is *not*  $J$ -compensated like the BUBI (Ehni and Luy, 2013) or BUBU (Ehni et al., 2022) pulse sandwiches. The pulses, however, are very short and unwanted effects within the bilinear rotations will be small. To save space, we present it in two-column format.

```
##TITLE= BURBOP180x_300us_BW5k_RF20k_pm30_99999.brk      99.999859, 125.305957
##JCAMP-DX=                                                99.999531, 117.847385
##DATA TYPE= Shape Data                                    99.999673, 110.090731
##OWNER= vm1188                                           100.0, 102.494654
##DATE= 2025-10-14                                       100.0, 95.522146
##Max_Amplitude= 20000.0                                  99.999762, 89.512262
##PULSE_LENGTH= 1.0 us                                   99.999596, 84.474322
##NPOINTS= 300                                           99.998967, 80.24602
##XYPOINTS= (XY..XY)                                     99.999998, 76.959932
99.999065, 172.678265                                     99.999997, 74.789848
99.998529, 151.376823                                     99.999488, 73.550887
99.99993, 131.248288                                     100.0, 72.930683
99.999566, 113.69846                                     99.999999, 72.850721
99.998269, 99.363945                                     99.999981, 73.371856
99.998695, 88.282618                                     100.0, 74.441799
99.999532, 80.214311                                     99.999722, 75.954341
99.998426, 74.861714                                     100.0, 77.826189
99.998369, 71.972405                                     100.0, 80.019688
99.998891, 71.369894                                     100.0, 82.506719
99.998876, 72.924567                                     100.0, 85.245508
99.999936, 76.505131                                     99.999721, 88.195596
99.999817, 81.889482                                     100.0, 91.317321
99.999889, 88.719232                                     100.0, 94.573116
99.999986, 96.496808                                     99.999954, 97.929
99.998742, 104.673167                                    100.0, 101.355322
99.998827, 112.756948                                    100.0, 104.808155
99.999297, 120.362768                                    99.999561, 108.239118
99.999083, 127.215939                                    99.999563, 111.592733
99.9997, 133.17078                                      100.0, 114.822975
99.999192, 138.187284                                    100.0, 117.959385
99.999974, 142.292313                                    100.0, 120.994806
99.999985, 145.535881                                    100.0, 123.776012
99.999566, 147.938783                                    100.0, 126.225054
100.0, 149.48643                                         100.0, 128.403382
99.999962, 150.136686                                    99.999456, 130.168553
99.999695, 149.833648                                    99.999937, 131.48218
100.0, 148.513409                                        100.0, 132.361485
99.999999, 146.113831                                    100.0, 132.742733
99.999452, 142.569666                                    100.0, 132.463799
99.999994, 137.883136                                    100.0, 131.597783
99.999652, 132.074755                                    100.0, 129.903137
```

|                        |                      |
|------------------------|----------------------|
| 99.999999, 127.766542  | 100.0, 53.75985      |
| 99.999999, 125.69388   | 100.0, 50.56323      |
| 100.0, 126.723428      | 100.0, 47.70215      |
| 100.0, 139.809244      | 100.0, 45.175701     |
| 100.0, 178.732641      | 100.0, 42.979485     |
| 99.999999, -141.039409 | 100.0, 41.089557     |
| 99.999279, -117.956966 | 100.0, 39.537838     |
| 99.998973, -105.710323 | 100.0, 38.306901     |
| 99.999994, -99.030287  | 100.0, 37.285183     |
| 100.0, -96.193802      | 99.999994, 36.589304 |
| 100.0, -95.661169      | 99.998735, 36.174258 |
| 99.999989, -95.896559  | 99.998613, 35.937031 |
| 99.999283, -96.329485  | 99.999684, 35.95352  |
| 99.999871, -96.865216  | 99.998486, 36.358413 |
| 100.0, -97.405097      | 100.0, 37.016611     |
| 100.0, -97.820026      | 100.0, 37.633217     |
| 100.0, -98.029848      | 100.0, 38.309147     |
| 99.998694, -98.00918   | 100.0, 39.918094     |
| 100.0, -97.750765      | 100.0, 39.524185     |
| 100.0, -97.238426      | 100.0, 40.125344     |
| 99.999871, -96.438307  | 99.999999, 36.184884 |
| 99.997831, -95.286857  | 100.0, 33.106372     |
| 99.998356, -93.774314  | 100.0, 28.333373     |
| 99.996735, -91.639294  | 100.0, 8.625448      |
| 100.0, -87.276682      | 100.0, -12.892778    |
| 99.999668, -80.585308  | 100.0, -26.046628    |
| 99.999994, 61.04477    | 100.0, -16.556865    |
| 99.999246, 128.517653  | 99.999279, 7.138899  |
| 99.997638, 129.029567  | 100.0, 29.868181     |
| 99.999984, 131.016937  | 100.0, 41.831938     |
| 100.0, 130.928942      | 100.0, 46.706733     |
| 100.0, 130.698377      | 100.0, 47.346605     |
| 99.999992, 130.223598  | 100.0, 44.155877     |
| 99.9995, 129.335271    | 99.999998, 40.718763 |
| 99.999973, 128.017484  | 99.999998, 38.313821 |
| 100.0, 126.234482      | 100.0, 36.283088     |
| 100.0, 123.965511      | 100.0, 34.64414      |
| 100.0, 121.204251      | 99.999997, 33.48571  |
| 100.0, 117.949289      | 99.999982, 32.77833  |
| 100.0, 114.209888      | 100.0, 32.505337     |
| 100.0, 110.018822      | 100.0, 32.680152     |
| 100.0, 105.437762      | 100.0, 33.231148     |
| 100.0, 100.548621      | 100.0, 34.081444     |
| 100.0, 95.440623       | 100.0, 35.263454     |
| 99.999152, 90.205824   | 99.999302, 36.832394 |
| 100.0, 84.944759       | 99.999954, 38.768249 |
| 100.0, 79.753875       | 100.0, 41.023474     |
| 99.999224, 74.720066   | 100.0, 43.588352     |
| 100.0, 69.915942       | 100.0, 46.457923     |
| 99.999244, 65.390117   | 100.0, 49.606645     |
| 100.0, 61.177267       | 100.0, 53.017356     |
| 100.0, 57.298051       | 100.0, 56.705459     |

|                        |                       |
|------------------------|-----------------------|
| 99.999411, 60.701343   | 99.999469, 126.018502 |
| 100.0, 65.004192       | 100.0, 126.439314     |
| 100.0, 69.557591       | 100.0, 126.382576     |
| 100.0, 74.275218       | 100.0, 125.648511     |
| 100.0, 79.085474       | 100.0, 124.704728     |
| 99.999996, 83.937139   | 100.0, 123.49168      |
| 100.0, 88.777086       | 100.0, 121.727031     |
| 100.0, 93.524265       | 100.0, 119.540051     |
| 99.999958, 98.0966     | 100.0, 117.237176     |
| 100.0, 102.467618      | 100.0, 114.791066     |
| 100.0, 106.599302      | 100.0, 112.054955     |
| 100.0, 110.401881      | 99.999493, 109.046779 |
| 100.0, 113.781757      | 100.0, 105.866575     |
| 100.0, 116.690911      | 100.0, 102.582799     |
| 100.0, 119.145341      | 100.0, 99.229899      |
| 100.0, 121.226374      | 100.0, 95.834987      |
| 100.0, 122.944384      | 100.0, 92.42907       |
| 100.0, 124.336758      | 100.0, 89.048169      |
| 100.0, 125.504342      | 99.999968, 85.732298  |
| 99.999491, 126.49177   | 99.999831, 82.523904  |
| 100.0, 127.203167      | 99.999974, 79.467     |
| 100.0, 128.87547       | 99.999453, 76.610637  |
| 100.0, 129.090422      | 99.999998, 74.001464  |
| 99.999985, 134.441716  | 99.999436, 71.69633   |
| 100.0, 84.414177       | 99.999426, 69.765604  |
| 99.998706, -78.396463  | 99.999415, 68.304479  |
| 99.999935, -88.278411  | 99.999887, 67.384413  |
| 100.0, -92.676889      | 99.999391, 66.981068  |
| 100.0, -95.232563      | 99.999377, 67.086255  |
| 100.0, -97.335214      | 99.999362, 67.967609  |
| 100.0, -98.965247      | 99.999347, 69.831165  |
| 100.0, -100.205147     | 99.999331, 72.550681  |
| 99.999988, -101.196618 | 99.999313, 76.215865  |
| 100.0, -101.963093     | 99.999292, 80.971306  |
| 100.0, -102.51407      | 99.999274, 86.64137   |
| 100.0, -102.848952     | 99.999261, 93.054115  |
| 100.0, -102.992286     | 99.999255, 100.051062 |
| 100.0, -102.995997     | 99.999275, 107.328912 |
| 100.0, -102.865198     | 99.999312, 114.509466 |
| 100.0, -102.626038     | 99.999365, 121.24213  |
| 100.0, -102.170966     | 99.999443, 127.248396 |
| 99.99774, -102.271915  | 99.999523, 132.33074  |
| 100.0, -105.290953     | 99.999601, 136.360618 |
| 100.0, -111.543376     | 99.999669, 139.27999  |
| 99.997322, -117.139368 | 99.999725, 141.106877 |
| 99.999634, -144.613089 | 99.999766, 141.885865 |
| 99.998212, 171.030553  | 99.999798, 141.634048 |
| 99.99999, 130.589332   | 99.99982, 140.338944  |
| 100.0, 120.327526      | 99.999833, 138.040273 |
| 100.0, 121.109818      | 99.999839, 134.825107 |
| 100.0, 123.601595      | 99.999837, 130.698343 |
| 100.0, 124.902787      | 99.999827, 125.761749 |

99.999807, 119.557368  
99.999774, 112.925678  
99.999722, 104.987322  
99.999643, 97.851548  
99.999526, 89.90598  
99.999368, 82.768883  
99.999155, 76.620001  
99.998902, 71.696247  
99.998652, 68.282156  
99.99845, 66.587006

99.998297, 66.791397  
99.998177, 69.074325  
99.997979, 73.696021  
99.997614, 80.98221  
99.997792, 91.498229  
99.999998, 105.359399  
99.998251, 122.830557  
99.998528, 143.461293  
99.999518, 165.723202  
##END=

## References

- Ehni, S. and Luy, B.: BEBE<sup>tr</sup> and BUBI: *J*-compensated Concurrent Shaped Pulses for <sup>1</sup>H–<sup>13</sup>C Experiments, *J. Magn. Reson.*, 232, 7–17, <https://doi.org/10.1016/j.jmr.2013.04.007>, 2013.
- Ehni, S., Koos, M. R., Reinsperger, T., Haller, J. D., Goodwin, D. L., and Luy, B.: Concurrent *J*-evolving Refocusing Pulses, *J. Magn. Reson.*, 336, 107 152, <https://doi.org/10.1016/j.jmr.2022.107152>, 2022.
- Woordes, Y. T., Reinsperger, T., Ehni, S., and Luy, B.: Robust Bilinear Rotations, *Sci. Adv.*, 11, eadx7094, <https://doi.org/10.1126/sciadv.adx7094>, 2025.
